1                    Social information-mediated population dynamics in non-grouping prey

2

3

Zoltán Tóth<sup>1,2\*</sup> & Gabriella Csöppü<sup>1</sup>

4

5    <sup>1</sup>Department of Zoology, Plant Protection Institute, Centre for Agricultural Research, ELKH,

6    Budapest, Hungary

7    <sup>2</sup>University of Debrecen, Debrecen, Hungary

8

9    \* Corresponding author: Zoltán Tóth, [toth.zoltan@atk.hu](mailto:toth.zoltan@atk.hu); ORCID: 0000-0002-2634-8393

10 **Abstract**

11 Inadvertent social information (ISI) use, i.e., the exploitation of social cues including the  
12 presence and behaviour of others, has been predicted to mediate population-level processes  
13 even in the absence of cohesive grouping. However, we know little about how such effects  
14 may arise when the prey population lacks social structure beyond the spatiotemporal  
15 autocorrelation originating from the random movement of individuals. In this study, we built  
16 an individual-based model where predator avoidance behaviour could spread among  
17 randomly moving prey through the network of nearby observers. We qualitatively assessed  
18 how ISI use may affect prey population size when cue detection was associated with different  
19 probabilities and fitness costs, and characterised the structural properties of the emerging  
20 detection networks that would provide pathways for information spread in prey. We found  
21 that ISI use was among the most influential model parameters affecting prey abundance and  
22 increased equilibrium population sizes in most examined scenarios. Moreover, it could  
23 substantially contribute to population survival under high predation pressure, but this effect  
24 strongly depended on the level of predator detection ability. When prey exploited social cues  
25 in the presence of high predation risk, the observed detection networks consisted of a larger  
26 number of connected components with smaller sizes and smaller ego networks than  
27 corresponding randomized networks; this resulted in efficient information spread among  
28 connected individuals in the detection networks. Our study provides hypothetical mechanisms  
29 about how temporary local densities may allow information diffusion about predation threats  
30 among conspecifics and facilitate population stability and persistence in non-grouping  
31 animals.

32  
33 **Keywords:** social information use, detection networks, predator-prey relationship, non-  
34 grouping animals, equilibrium population size, individual-based model

35 **Significance Statement**

36 The exploitation of inadvertently produced social cues may not only modify individual  
37 behaviour but also fundamentally influence population dynamics and species interactions.  
38 Using an individual-based model, we investigated how the detection and spread of adaptive  
39 antipredator behaviour may cascade to changes in the demographic performance of randomly  
40 moving (i.e., non-grouping) prey. We found that social information use contributed to  
41 population stability and persistence by reducing predation-related per capita mortality and  
42 raising equilibrium population sizes when predator detection ability reached a sufficient level.  
43 We also showed that temporary detection networks had structural properties that allowed  
44 efficient information spread among prey under high predation pressure. Our work represents a  
45 general modelling approach that could be adapted to specific predator-prey systems and  
46 scrutinize how temporary local densities allow dynamic information diffusion about predation  
47 threats and facilitate population stability in non-grouping animals.

48 **Introduction**

49 Organisms have to gather information about their surroundings to overcome challenges such  
50 as finding resources and avoiding danger (Dall and Johnstone 2002). For that, individuals  
51 directly interact with the environment to gain up-to-date information about its state ('personal  
52 information'; Dall et al. 2005), but they can also complement that knowledge by utilizing  
53 social information for optimal decision-making (Galef and Giraldeau 2001; Bonnie and  
54 Earley 2007; Hoppitt and Laland 2013). One type of social information is associated with  
55 inadvertently produced social cues that include the presence or the behaviour of others, or the  
56 product of their behaviour such as scent marks, excretions or food remnants, all of which may  
57 provide relevant information about current environmental conditions. Inadvertent social  
58 information (ISI) use is known to occur in many ecological contexts, including predator  
59 avoidance, foraging and habitat choice (Danchin et al. 2004; Gil et al. 2018), and is usually  
60 associated with species where social interactions promote information transmission among  
61 group-mates (King and Cowlshaw 2007; Duboscq et al. 2016; Gil et al. 2017).

62 Under predation risk, dynamic information about threats is transmitted from alarmed  
63 group members to naïve ones, a phenomenon that is commonly called collective detection  
64 (Lima 1990; Pays et al. 2013). This process often takes place through evolved signals such as  
65 alarm calls, but social cues including sudden movements (Coleman 2008; Hingee and  
66 Magrath 2009; Boujja-Miljour et al. 2017), fright responses (Chivers and Ferrari 2014; Cruz  
67 et al. 2020), or changes in posture (Brown et al. 1999; Pays et al. 2013) have also been found  
68 to convey information about the presence of predators in animal collectives. Adjustments to  
69 the behaviour of others (also referred to as 'behavioural contagion'; Firth 2020) do not only  
70 affect individual fitness by increasing survival probabilities, but can also lead to the  
71 emergence of correlated behaviours and space use in many individuals and thus influence  
72 system-level functions (Goodale et al. 2010; Gil et al. 2018; Tóth 2021). Previous theoretical

73 models have predicted that ISI use can prevent population collapses under high predation  
74 pressure (Gil et al. 2017, 2018) and facilitate the coexistence of competing species that share  
75 common predators (Parejo and Avilés 2016; Gil et al. 2019). Empirical evidence also  
76 indicates that the utilization of social information can influence the material flux on the  
77 ecosystem level (Gil and Hein 2017). By promoting adaptive behavioural responses to  
78 environmental uncertainties (e.g., due to anthropogenic effects [Greggor et al. 2017], in the  
79 distribution of resources [O’Mara et al. 2014] or predation risk [Crane et al. 2021]), ISI use  
80 has the potential to render morphological, physiological or genetic adaptations redundant or  
81 only partially necessary (Laland 1992).

82         Lacking motivation for social cohesion, non-grouping animals do not maintain spatial  
83 proximity with others, and thus direct interactions between conspecifics can be infrequent.  
84 Nevertheless, such individuals may also exploit social cues (e.g., visual, acoustic, chemical or  
85 vibrational cues) when these are within the range of relevant sensory perception. Moreover,  
86 social information may also diffuse among nearby observers via ‘detection networks’  
87 (reviewed in Tóth et al. 2020). If so, spatial changes in social cues over time (e.g., relative  
88 differences in activity and associated conspicuousness; Chivers and Ferrari 2014) can provide  
89 dynamic information about predation threats in many terrestrial and aquatic systems (Gil et al.  
90 2017). In accordance with this idea, wood crickets (*Nemobius sylvestris*) adaptively change  
91 their behaviour after having observed the predator avoidance behaviour of knowledgeable  
92 conspecifics, and this information is transmitted to and utilized by other naïve individuals as  
93 well (Coolen et al. 2005). In temporary aggregations, escape responses of Iberian green frogs  
94 (*Rana perezi*) are also influenced by the behaviour of adjacent conspecifics (Martín et al.  
95 2006). In mixed-species aggregations of non-schooling fish, the density and behaviour (when  
96 to feed in and when to flee from the foraging area) of nearby individuals are being used as  
97 inadvertent social information (Gil and Hein 2017). The resulting behavioural coupling

98 among individuals, in turn, affects both species abundance and the amount of algae consumed  
99 and as a result, determines the total material flow in the coral reef ecosystem. While such  
100 observations prove that threat-related social cues can be exploited by non-grouping animals in  
101 some instances, the general conditions under which ISI use exerts a positive effect on  
102 population stability and persistence in such species have remained largely unexplored. For  
103 example, thresholds associated with the cost of antipredator behaviour and probabilities of cue  
104 detection (i.e., the detection of predators or conspecifics' behaviour) may set boundaries for  
105 social information-modulated population-level effects under different predation pressure  
106 regimes. Similarly, detection networks may have only a limited capacity to provide efficient  
107 information pathways for the emergence of such effects.

108 In this study, we investigated how the detection and spread of predator avoidance  
109 behaviour among conspecifics affected demographic performance in non-grouping prey. We  
110 constructed an individual-based model of prey and generalist predator populations where  
111 individuals (both prey and predators) moved randomly on the landscape, and social  
112 information could diffuse through the observation of antipredator behaviour in prey. This  
113 model, an extension of our earlier model presented by Tóth (2021), allowed us to assess  
114 qualitatively how ISI use may cascade to changes in population size and examine the  
115 structural properties of detection networks in prey populations that lack social structure.

116

## 117 **Materials and Methods**

### 118 **Model construction**

119 We simulated a continuous 2D landscape ( $80 \times 80$  spatial units) where both prey and  
120 predators moved randomly by exhibiting correlated random walks (CRW). CRW considers  
121 short-term correlations between successive step orientations and has been used to model  
122 animals' random search paths for a long time (Benhamou 2006; Codling et al. 2008). At the

123 start of a simulation cycle, 500 prey and 150 predators were randomly placed on the  
124 landscape, and then individuals performed a given set of behaviours (Fig. 1, Table 1). During  
125 movement, each individual's movement distance was randomly selected between zero and a  
126 maximum value given by the parameters  $d_{\text{prey}}$  and  $d_{\text{P}}$  for prey and predators, respectively.  
127 Turning angles were determined by random deviates drawn from wrapped Cauchy circular  
128 distribution with  $\mu=0$  and  $\rho=0.8$ . At the landscape edge, individuals moved to the opposite  
129 side of the landscape when crossing a boundary and continued moving (i.e., torus landscape  
130 with no edge). Both prey and predator could also detect other individuals through the  
131 landscape boundary. We assumed that only one individual could survive within the range of  
132 one spatial unit due to competition in both prey and predators (after movement and dispersion  
133 of offspring; see Fig. 1), introducing density-dependent mortality in their populations. In this  
134 system, we assumed non-dynamic predators that can exert high pressure on the prey  
135 population, thus predator population size was determined only by their reproductive rate and  
136 density-dependent mortality, but was unaffected by the success of hunting (as if switching to  
137 alternative prey when necessary). Consequently, predator and prey populations were  
138 noncyclic and demographically decoupled (for a similar approach, see Gil et al. 2019), and  
139 prey populations experienced predation pressures that were directly proportional to the given  
140 value of predators' reproduction-related parameter (Table 1).

141 In the absence of predators, prey moved, competed, fed and reproduced in the  
142 simulated landscape. Prey population size resulted in this scenario was regarded as being in  
143 equilibrium at the carrying capacity of the environment. When present, each predator could  
144 consume a maximum of two prey individuals in a cycle within its hunting range, which was  
145 defined as an  $r_{\text{P}}$  distance from the predator's position in any direction. Prey could detect  
146 predators that were  $r_{\text{prey}}$  distance with a probability given by  $P_{\text{detect}}$  (determined by individual  
147 Bernoulli trials). Upon successfully detecting a predator, prey became alarmed and hid, and

148 thus was undetectable to predators. However, these individuals did not feed either and  
149 consequently could have a reduced reproduction rate. Thus, prey animals were capable of  
150 behaviourally adjusting their exposure to predators (with the probability ranging between 0.1  
151 and 0.9; see Table 1), but this antipredator behaviour potentially incurred a fitness cost. Lima  
152 and Dill (1990) summarized supporting evidence for such scenarios in multiple taxa.  
153 Predators hunted on visible, feeding prey with a 50% success (determined by individual  
154 Bernoulli trials). Prey could also detect predators indirectly by observing alarmed  
155 conspecifics within  $r_{\text{prey}}$  distance with a probability given by  $P_{\text{isi}}$  (determined by individual  
156 Bernoulli trials). Being alarmed had the same consequences (i.e., immune to predation,  
157 reduced reproduction rate) irrespective of the detection mode. We did not manipulate cue  
158 reliability in the model, we simply considered that ISI use had a higher cost when social cues  
159 could also be false and individuals responded to those indiscriminately. Prey feeding occurred  
160 once in a cycle in prey that was not hiding. The number of offspring for each individual was  
161 sampled from a Poisson distribution with the shape parameter given by  $\lambda_{\text{reduced}}$  for alarmed  
162 prey,  $\lambda_{\text{max}}$  for fed prey, and  $\lambda_{\text{p}}$  for predators in each cycle. Offspring dispersed in the same  
163 cycle 8, 9 or 10 spatial units away (randomly chosen) from the parent in both prey and  
164 predators. These higher step values (10 spatial units is the double of maximum  $d_{\text{prey}}$  and  $d_{\text{p}}$ )  
165 were chosen to reflect that juvenile dispersion distances can far exceed adult movement  
166 ranges.

167

### 168 **Detection networks**

169 From the spatial distribution of prey, we defined detection networks based on the range within  
170 which individuals could observe the behaviour of others (i.e., exploit social cues if present) in  
171 each simulation cycle (Fig. 2). In such networks, nodes represent individuals, and edges  
172 denote the possibility of mutual observation. If a prey individual became alarmed because it



173 successfully detected a predator, information could spread from this individual to other  
174 conspecifics in the network under the following rules. The probability of information  
175 acquisition from one node to another is given by  $w^k$ , where  $w$  is the edge weight  
176 (corresponding to the probability of information spread from one node to another through the  
177 edge between them and specified by the parameter  $P_{isi}$  in the model) and  $k$  is the number of  
178 steps on the shortest path between the two nodes. Only shortest paths were used to minimize  
179 the “travel time” of information between nodes in the network. During simulations, the  
180 maximum number of steps between the focal and the observed nodes was set to two and the  
181 total number of observed neighbours to ten (i.e.,  $k_{\max}=2$  and  $\sum(n)_{\max}=5$  in each  $k$  step). Thus,  
182 an individual could receive information from a maximum of ten of its neighbours that were a  
183 maximum of two steps away in the detection network. With such restrictions, ISI use did not  
184 facilitate the emergence of large aggregations in prey and did not occur far outside the hunting  
185 range of predators. If there were more than five nodes at  $k$  step to a focal node, we randomly  
186 selected five. For any individual, the total probability of receiving information from its  
187 neighbours was calculated using the inclusion-exclusion principle (Allenby and Slomson  
188 2010).

189

### 190 **Analysis of simulation outputs**

191 All simulations and calculations were performed in R 4.0.4 (R Core Team 2021). Instead of  
192 frequentist hypothesis testing, we focused on evaluating the magnitude of differences between  
193 simulation runs with different parameter settings (White et al. 2014). We ran the population  
194 simulations for 200 cycles (this interval was sufficient to reach equilibrium prey population  
195 size in the studied scenarios; see in Fig. 3a) and used the data from the last cycle in all  
196 calculations. R script for model construction and simulated data are available at Figshare  
197 (<https://figshare.com/s/34fc714342dab9123193>).

198 We characterised prey population sizes by calculating the mean, standard deviation,  
199 maximum and minimum values in four settings: in the absence of predators, with minimal  
200  $P_{\text{detect}}$ , with nominal  $P_{\text{detect}}$ , and with nominal  $P_{\text{detect}}$  and  $P_{\text{isi}}$  parameter values, respectively. All  
201 other parameters were set to their initial values; for each model type, simulations were iterated  
202 50 times. When the predator detection probability was set to its minimal value, the prey  
203 population died out in a single iteration; prey extinction was not observed in other settings.

204 We used Morris's „OAT” elementary effects screening method (Morris 1991) with the  
205 extension introduced by Campolongo et al. (2007) as a global sensitivity analysis (SA) to rank  
206 the model parameters according to their impact on prey population size. We chose this SA  
207 because it produces results comparable to the more complex methods (Confalonieri et al.  
208 2010) and is applicable to uncover the mechanisms and patterns produced by individual-based  
209 models (Imron et al. 2012; Beaudouin et al. 2015; Ten Broeke et al. 2016). The mean of the  
210 absolute value of the elementary effect ( $\mu^*_i$ ) provides a measure for the overall influence of  
211 each input variable on the model output, whereas the standard deviation of the elementary  
212 effect ( $\sigma_i$ ) indicates possible non-linear effects or interactions among variables (Campolongo  
213 et al. 2007; Iooss & Lemaître 2015). We also ranked the model parameters using a global  
214 index (GI) (Ciric et al. 2012) calculated as:

215

$$GI = \sqrt{(\mu^*_i)^2 + (\sigma_i)^2}$$

216

217 For the space-filling sampling strategy proposed by Campolongo et al. (2007), we generated  
218  $r_2 = 1000$  Morris trajectories and then retained  $r_1 = 50$  with the highest ‘spread’ in the input  
219 space to calculate the elementary effect for each model parameter.

220 We examined how predator density affected mortality rate due to predation in prey in  
221 the presence of minimal  $P_{\text{detect}}$ , nominal  $P_{\text{detect}}$ , and nominal  $P_{\text{detect}}$  and  $P_{\text{isi}}$  parameter values,

222 respectively. All other parameters were set to their initial values. In each setting, simulation  
223 runs were iterated 50 times. If the prey population died out before the 200<sup>th</sup> simulation cycle,  
224 the given run was omitted from the dataset ( $n=209$ ; only in the ‘minimal predator detection’  
225 setting).

226 We also explored a specific part of the parameter space that included the parameters  
227  $P_{\text{detect}}$ ,  $P_{\text{isi}}$ ,  $\lambda_P$  and  $\lambda_{\text{reduced}}$ . Specifically, we investigated the effect of ISI use at low,  
228 intermediate and high levels of predator detection probabilities. In each scenario, predator  
229 avoidance behaviour had either no cost or incurred moderate fitness cost (i.e., decreased by  
230 one third compared to the maximum) and predation pressure was either low (0.025),  
231 intermediate (0.05) or high (0.075). In each setting, we used the complete range of parameter  
232 values for  $P_{\text{isi}}$  (Table 1). Simulations were iterated 30 times. In the low predator detection  
233 probability scenario coupled with high predation pressure, the prey population died out in the  
234 majority of simulation runs ( $n=581$ ); these simulation outputs were omitted from the  
235 assembled dataset.

236 We generated network data by running the model with  $\lambda_P=0.075$  (i.e., under a high  
237 level of predation pressure) and  $P_{\text{isi}}=0$  or 0.5 (all other parameters were set to their nominal  
238 values). Then, we calculated the number of components, component size, average ego  
239 network and average global efficiency as structural network properties to characterize the  
240 emerging detection networks. Simulations were repeated 50 times in each parameter setting.  
241 To test whether the global structure of these networks is different from random, we calculated  
242 the same characteristics for randomised detection networks. These were constructed from the  
243 observed detection networks by randomly reshuffling the edges between nodes while also  
244 retaining the original degree distributions. Thus, randomisation was constrained based on the  
245 most fundamental structure of the original networks (Croft et al. 2011). The number of  
246 components represents the number of connected parts in the detection networks (isolated

247 nodes excluded). We computed component size as the number of components divided by the  
248 number of connected nodes; this measure denotes the average number of nodes embedded  
249 within components. We calculated the average size of ego networks as the mean number of  
250 reachable nodes within two steps in the components. To estimate transmissibility within  
251 components, we used the measure ‘global efficiency’ (Pasquaretta et al. 2014; Romano et al.  
252 2018; Latora and Marchiori 2001). Global efficiency for a graph with  $N$  vertices is:

253

$$E_{\text{global}}(G) = \frac{1}{N(N-1)} \sum_{i \neq j} \frac{1}{d_{ij}}$$

254

255 where  $d_{ij}$  is the shortest path length between nodes  $i$  and  $j$ . The value of this measure ranges  
256 from 0 to 1, and represents how fast information may spread from the source to the most  
257 peripheral network positions with the least number of connections (Romano et al. 2018). We  
258 computed global efficiency for the largest components in the networks. For the calculation of  
259 the above network properties, we used the ‘igraph’ and ‘brainGraph’ R packages (Csardi and  
260 Nepusz 2016; Watson 2020).

261

## 262 **Results**

263 We found that nominal predation pressure coupled with minimal predator detection  
264 probability ( $P_{\text{detect}}=0.1$ ) led to small prey population size with high variation among runs  
265 compared to the null model when predators were absent and prey population existed at the  
266 carrying capacity of the environment (Fig. 3a, Table 2). Nominal predator detection  
267 probability ( $P_{\text{detect}}=0.5$ ) increased mean prey population size and stabilised the prey  
268 population at higher abundance values, while in the presence of nominal probability of ISI use  
269 in prey ( $P_{\text{detect}}=0.5$  &  $P_{\text{isi}}=0.5$ ), prey population size increased further by approx. 53%. The  
270 sensitivity analysis also confirmed that  $P_{\text{isi}}$  was an influential model input in the constructed

271 model (Fig. 3b). As expected, the parameters driving antipredator behaviour, i.e. the level of  
272 predation pressure, the probability of predator detection directly or via conspecifics, and the  
273 cost associated with performing antipredator behaviour, were all important and characterised  
274 by non-linear effects on prey abundance and/or strong interactions with other parameters. The  
275 parameters  $d_{\text{prey}}$  and  $d_{\text{p}}$  had considerably less influence on the dispersion of the model output,  
276 and were fixed to their nominal values in the subsequent analyses. The mechanism behind the  
277 effect of  $P_{\text{isi}}$  was that the presence of ISI use could decrease the per capita mortality due to  
278 predation across the whole range of the examined predation pressure regime and substantially  
279 mitigate the positive relationship between predation-related mortality rate and predator  
280 population size (Fig. 4).

281 Consistent with expectations,  $P_{\text{isi}}$  affected prey number in all examined  $P_{\text{detect}}$   
282 scenarios in interaction with the effect of cost and predator pressure (Fig. 5). This relationship  
283 was positive and nonlinear in most cases. When the predation pressure was low,  $P_{\text{isi}}$  positively  
284 influenced prey abundance to a limited extent, while the effect of the associated cost,  
285 especially at lower  $P_{\text{isi}}$  values, depended on the value of  $P_{\text{detect}}$ . When the predation pressure  
286 was intermediate or high,  $P_{\text{isi}}$  exerted a more substantial influence on prey abundance and had  
287 the capacity to double the number of prey individuals irrespective of the presence or absence  
288 of associated cost. Importantly, ISI use could counteract high predation pressure only when  
289  $P_{\text{detect}}$  had a sufficient value (directly dependent on the degree of predation pressure), and did  
290 not compensate for low predator detection ability as indicated by the high prevalence of  
291 population extinctions in prey when high predation pressure was coupled with low predator  
292 detection ability. The presence of associated fitness cost in the high predation pressure  
293 settings greatly reduced the magnitude of the effect of ISI use on prey population size, but  $P_{\text{isi}}$   
294 could still increase prey population size even at intermediate values if  $P_{\text{detect}} > 0.25$ .

295 All structural properties of the detection networks differed qualitatively from corresponding  
296 randomised networks under high predation pressure, but mostly when social information  
297 spread through the detection networks (Fig. 6). In this scenario, the observed detection  
298 networks were characterized by higher numbers of components that consisted of fewer  
299 connected individuals and smaller ego networks than their randomized counterparts. Global  
300 efficiency within the largest components, therefore, was also high in the observed detection  
301 networks, indicating efficient information transmission among individuals whenever  
302 connected prey was able to detect nearby predators. These attributes of functioning detection  
303 networks were not the direct consequence of higher prey population size in the presence of ISI  
304 use, because the corresponding randomized networks did not show the same degree of  
305 structural changes compared to the  $P_{isi}=0$  setting.

306

## 307 **Discussion**

308 Social information use has been assumed both to increase individual fitness and to affect  
309 population- and community-level processes (Dall et al. 2005; Gil et al. 2018). We expected  
310 that such effects could emerge in randomly moving non-grouping prey if behavioural  
311 contagion can occur through detection networks, i.e., a dynamic system of temporary  
312 observation-based connections between conspecifics. We found that irrespective of the  
313 apparent stochasticity in our model, the sharing of adaptive antipredator behaviour could  
314 contribute to population stability and persistence in prey by mitigating predation-related per  
315 capita mortality and raising equilibrium population sizes. We also showed that temporary  
316 detection networks had structural properties that allowed the efficient spread of adaptive  
317 antipredator behaviour among prey under high predation pressure. In animal groups,  
318 information spreads via social connections among individuals and social network positions  
319 strongly interact with individual spatial behaviour (Firth and Sheldon 2016; Spiegel et al.

2016; Webber & Vander Wal 2018; Albery et al. 2021), thus movement characteristics and  
space use are shaping information transmission by affecting social connections. Our findings  
indicate that non-grouping animals, by being embedded in detection networks based on their  
perception attributes and spatial locations, can benefit from similar information transmission  
processes as well.

Our results corroborate with previous studies indicating that social information may  
act as a stabilizing mechanism in systems where predators can exert high pressure on prey  
populations (Gil et al. 2017, 2018, 2019). While in those models social information directly  
reduced (following a specific function) the per capita mortality (e.g., Gil et al. 2018), the  
presented work offers a more mechanistic understanding of how inadvertent social  
information could propagate through a population of randomly moving individuals. Our  
findings indicate that predator detection ability had to reach a sufficient level, strongly  
dependent on the actual level of predation pressure, for ISI use to facilitate prey population  
persistence. Notably, when this condition was met, ISI use exerted a detectable positive  
influence on prey population size by relaxing predation pressure even at low probabilities and  
even if the adaptive antipredator behaviour incurred a fitness cost. Although the depth of our  
understanding of the detected non-linear relationships and potential thresholds is limited by  
their coarse-grained variation in these parameters examined here, simulations nonetheless  
prove that in a substantial part of the parameter space social information use can be expected  
to raise non-grouping prey population size and facilitate its persistence. These findings may  
have crucial implications in many theoretical and applied ecological contexts, ranging from  
the invasive dynamics of predator-prey systems to the efficiency of biological control  
practices. For instance, the recognition of novel predators by naïve prey has been associated  
with social information use via different perception modalities in fish (Ferrari et al. 2005;  
Manassa et al. 2013), and similar utilization of social cues in birds has been shown to

345 facilitate the spread of novel aposematic prey (Thorogood et al. 2017; Hämäläinen et al.  
346 2021). Such social information-mediated interactions between prey and predators might be  
347 more prevalent in natural ecosystems that include non-grouping species as well, contributing  
348 to deviations from the predictions of theoretical models in the dynamics of trophic  
349 interactions (Polis et al. 2000). When natural enemies are used as biological control agents for  
350 pest management, social diffusion of antipredator responses may substantially reduce  
351 predation rates rendering these practices less effective and profitable. Besides, it may also  
352 mitigate the expected positive impact of the non-consumptive effects of predators (NCEs;  
353 Preisser et al. 2007; Sih et al. 2010) such as decreased crop damage due to reduced feeding  
354 rate in pests (Beleznai et al. 2017; Tholt et al. 2018). This inflation of NCEs due to  
355 information spread can generate discrepancies in the findings of large-scale field studies and  
356 laboratory experiments (see in Weissburg et al. 2014), and should be taken into consideration  
357 in investigations that aim to evaluate how NCEs may trigger trophic cascades in different  
358 ecosystems (Herman and Landis 2017; Haggerty et al. 2018; Pessarrodona et al. 2019).

359         Detection networks had distinct structural characteristics compared to the randomised  
360 networks when prey experienced high predation pressure and exploited social cues to avoid  
361 predators. These networks typically consisted of many components with few connected  
362 individuals and small average ego networks, and within these small components, social  
363 information could spread with relatively high efficiency. The key to understanding the  
364 differences in structural properties of detection networks in the presence and absence of ISI  
365 use lies in identifying the process that generates more and smaller components. One plausible  
366 explanation is that prey distribution in the simulated landscape could remain more  
367 homogeneous due to a decreased susceptibility to predation in the vicinity of predators as the  
368 diffusion of social information greatly enhances the probability of predator detection even  
369 among a few nearby individuals. While high network efficiency has previously been



370 identified in small groups, cognitive abilities and strong social affiliations have usually been  
371 involved in explaining this emergent property (Waters and Fewell 2012; Pasquaretta et al.  
372 2014). Our findings indicate that incidental connections may generate networks that have  
373 similar favourable attributes. In addition to differences in the sizes of connected components,  
374 there may be other key differences in how information spreads through detection or sensory  
375 networks among group-living (Strandburg-Peshkin et al. 2013; Rosenthal et al. 2015;  
376 Davidson et al. 2021) and non-grouping individuals, however. First, behavioural contagion  
377 can be complex, and the number of non-alarmed individuals within the detection range  
378 influences the likelihood of adopting a specific behaviour (Firth 2020). Previous works on  
379 social species have provided mounting evidence for such complex contagion (Hoppitt and  
380 Laland 2013; Grüter and Leadbeater 2014; Kendal et al. 2018). Second, imperfect copying  
381 might decrease the intensity of behavioural responses with each transmission step, and under  
382 a given threshold intensity, social cues exert no response from nearby observers. In this case,  
383 individuals' ability to convey information about predation hazards is related to the extent of  
384 behavioural change compared to a baseline level (Chivers and Ferrari 2014). Third,  
385 phenotypic heterogeneity among individuals may influence information diffusion if individual  
386 traits (e.g., related to hunger, age or developmental stage) or functional traits that transcend  
387 species (e.g., similarity in body size that may lead to shared predators) affects the individual  
388 capacity to produce social information (Farine et al. 2015).

389         To describe how ISI use may affect population dynamics in non-grouping prey, we  
390 constructed a tentative model with naturalistic predator-to-prey ratios (1:1.03 [when predator  
391 detection probabilities was set to minimal]–1:4.23 [with nominal predator detection and ISI  
392 use probabilities]; see in Donald and Anderson 2003). Previous observations indicate that  
393 predator detection probability, which has been found to play a crucial role in the emergence of  
394 social information-mediated effects in our study, can have a value within the upper half of the

395 range examined here (i.e.,  $>0.5$ ) under relevant conditions (e.g., Tisdale and Fernández-Juricic  
396 2009; Manzur et al. 2018). However, being strongly dependent on the neuronal pathways  
397 underlying detection mode and the processing capacity of the brain (Clark and Dukas 2003,  
398 Pereira and Moita 2016), it can differ significantly between species and even within the same  
399 species as it may also depend on the forager's state of energy reserves (Clark and Mangel  
400 2000). Therefore, to construct a more realistic model, both species-specific and context-  
401 specific information for existing predator-prey relationships need to be incorporated, which  
402 can be done only at the expense of generality. Model precision may be further enhanced by  
403 incorporating additional variables including the functional response of specific predator  
404 species (Dunn and Hovel 2020), different non-consumptive effects (other than reduced  
405 feeding rate) (Peckarsky et al. 2008), a measure of social cue reliability (Dunlap et al. 2016),  
406 social information use in predators (Falk et al. 2015), or landscape heterogeneity that could  
407 alter the space use of individuals (Albery et al. 2021). The effects of different transmission  
408 modes can also be tested, for instance, by weighting the probability of information diffusion  
409 among conspecifics by the proportion of alarmed and non-alarmed individuals within the  
410 detection zone or incorporating heterogeneity among individuals in attributes that affect their  
411 propensity to act as social cue producers. Our work, thus, represents a general modelling  
412 approach that could be applied to predator-prey systems in which populations are  
413 demographically decoupled, and prey may mitigate predation hazards through the exploitation  
414 of incidentally produced social information.

415

#### 416 **Acknowledgements**

417 We are indebted to Béla Keresztfalvi for providing access to the institutional IT resources,  
418 with which we were able to reduce the computational time of the performed simulations  
419 radically.

420

421 **Statements and Declarations**

422 **Funding**

423 ZT was financially supported by the Prémium Postdoctoral Research Programme of the  
424 Hungarian Academy of Sciences (MTA, PREMIUM-2018-198), by the János Bolyai  
425 Research Scholarship of the Hungarian Academy of Sciences (MTA, BO/00634/21/8) and by  
426 the New National Excellence Program of the Ministry for Innovation and Technology (ITM,  
427 ÚNKP-21-5-DE-478) from the source of the National Research, Development and Innovation  
428 Fund. GC was financially supported by the Young Researcher Programme of the Hungarian  
429 Academy of Sciences (MTA, Mv-41/2020).

430

431 **Conflict of interest**

432 The authors have no conflict of interest to declare.

433

434 **Ethics approval**

435 Not applicable.

436

437 **Consent to participate**

438 Not applicable.

439

440 **Consent for publication**

441 Not applicable.

442

443 **Data availability**

444 Data files supporting the results are archived and available at Figshare  
445 (<https://figshare.com/s/34fc714342dab9123193>). Upon reasonable requests, R codes for the  
446 model functions are also available from the corresponding author.

447

#### 448 **Authors' contributions**

449 ZT and CG conceived and designed the study. ZT constructed the model, performed the  
450 simulations, analysed the model output, wrote the initial manuscript, and revised and edited  
451 the subsequent versions. CG contributed substantially to the text and revisions.

452

#### 453 **References**

- 454 Albery GF, Morris A, Morris S, Pemberton JM, Clutton-Brock TH, Nussey DH, Firth JA  
455 (2021) Multiple spatial behaviours govern social network positions in a wild ungulate.  
456 *Ecol Lett* 24:676–686
- 457 Allenby RBJT, Slomson A (2010) *How to Count: An Introduction to Combinatorics, Discrete*  
458 *Mathematics and Its Applications*. 2nd edn CRC Press, Boca Raton, pp 51–60
- 459 Beaudouin R, Goussen B, Piccini B, Augustine S, Devillers J, Brion F, Péry AR (2015) An  
460 individual-based model of zebrafish population dynamics accounting for energy  
461 dynamics. *PLoS ONE* 10:e0125841
- 462 Beleznai O, Dreyer J, Tóth Z, Samu F (2017) Natural enemies partially compensate for  
463 warming induced excess herbivory in an organic growth system. *Sci Rep* 7(1):1–9
- 464 Benhamou S (2006) Detecting an orientation component in animal paths when the preferred  
465 direction is individual-dependent. *Ecology* 87:518–528
- 466 Bonnie KE, Earley RL (2007) Expanding the scope for social information use. *Anim Behav*  
467 74:171–181

- 468 Boujja □ Miljour H, Leighton PA, Beauchamp G (2017) Spread of false alarms in foraging  
469 flocks of house sparrows. *Ethology* 123:526–531
- 470 Brown GE, Godin JGJ, Pedersen J (1999) Fin-flicking behaviour: a visual antipredator alarm  
471 signal in a characin fish, *Hemigrammus erythrozonus*. *Anim Behav* 58:469–475
- 472 Campolongo F, Cariboni J, Saltelli A (2007) An effective screening design for sensitivity  
473 analysis of large models. *Environ Model Softw* 22:1509–1518
- 474 Chivers DP, Ferrari MC (2014) Social learning of predators by tadpoles: does food restriction  
475 alter the efficacy of tutors as information sources? *Anim Behav* 89:93–97
- 476 Ciric C, Ciffroy P, Charles S (2012) Use of sensitivity analysis to identify influential and non-  
477 influential parameters within an aquatic ecosystem model. *Ecol Modell* 246:119–130
- 478 Clark CW, Dukas R (2003) The behavioral ecology of a cognitive constraint: limited  
479 attention. *Behav Ecol* 14(2):151–156
- 480 Clark CW, Mangel M (2000) *Dynamic state variable models in ecology*. Oxford University  
481 Press, New York
- 482 Codling EA, Plank MJ, Benhamou S (2008) Random walk models in biology. *J R Soc*  
483 *Interface* 5:813–834
- 484 Coleman SW (2008) Mourning dove (*Zenaida macroura*) wing-whistles may contain threat-  
485 related information for con- and hetero-specifics. *Sci Nat* 95:981
- 486 Confalonieri R, Bellocchi G, Bregaglio S, Donatelli M, Acutis M (2010) Comparison of  
487 sensitivity analysis techniques: a case study with the rice model WARM. *Ecol*  
488 *Modell* 221(16):1897–1906
- 489 Coolen I, Dangles O, Casas J (2005) Social learning in noncolonial insects? *Curr Biol*  
490 15:1931–1935

- 491 Crane AL, Demers EE, Feyten LE, Ramnarine IW, Brown GE (2021) Exploratory decisions  
492 of Trinidadian guppies when uncertain about predation risk. *Anim Cogn* DOI:  
493 10.1007/s10071-021-01575-4
- 494 Croft DP, Madden JR, FranksDW, James R (2011) Hypothesis testing in animal social  
495 networks. *Trend Ecol Evol* 26(10):502–507
- 496 Cruz A, Heinemans M, Marquez C, Moita MA (2020) Freezing displayed by others is a  
497 learned cue of danger resulting from co-experiencing own freezing and shock. *Curr Biol*  
498 30:1128–1135
- 499 Csardi G, Nepusz T (2006) The igraph software package for complex network research. *Int J*  
500 *Complex Syst* 1695:1–9
- 501 Dall SR, Johnstone RA (2002) Managing uncertainty: information and insurance under the  
502 risk of starvation. *Philos Trans R Soc B* 357:1519–1526
- 503 Dall SR, Giraldeau L-A, Olsson O, McNamara JM, Stephens DW (2005) Information and its  
504 use by animals in evolutionary ecology. *Trends Ecol Evol* 20:187–193
- 505 Danchin E, Giraldeau L-A, Valone TJ, Wagner RH (2004) Public information: from nosy  
506 neighbors to cultural evolution. *Science* 305:487–491
- 507 Davidson JD, Sosna MMG, Twomey CR, Sridhar VH, Leblanc SP, Couzin ID (2021)  
508 Collective detection based on visual information in animal groups. *J R Soc Interface*  
509 18:20210142
- 510 Donald DB, Anderson RS (2003) Resistance of the prey to predator ratio to environmental  
511 gradients and to biomanipulations. *Ecology* 84(9):2387–2394
- 512 Duboscq J, Romano V, MacIntosh A, Sueur C (2016) Social information transmission in  
513 animals: lessons from studies of diffusion. *Front Psychol* 7:1147
- 514 Dunlap AS, Nielsen ME, Dornhaus A, Papaj DR (2016) Foraging bumble bees weigh the  
515 reliability of personal and social information. *Curr Biol* 26(9):1195–1199

- 516 Dunn RP, Hovel KA (2020) Predator type influences the frequency of functional responses to  
517 prey in marine habitats. *Biol Lett* 16:20190758
- 518 Falk JJ, ter Hofstede HM, Jones PL, Dixon MM, Faure PA, Kalko EK, Page RA (2015)  
519 Sensory-based niche partitioning in a multiple predator–multiple prey community. *Proc*  
520 *R Soc B* 282:20150520
- 521 Farine DR, Montiglio PO, Spiegel O (2015) From individuals to groups and back: the  
522 evolutionary implications of group phenotypic composition. *Trends Ecol Evol* 30:609–  
523 621
- 524 Ferrari MC, Trowell JJ, Brown GE, Chivers DP (2005) The role of learning in the  
525 development of threat-sensitive predator avoidance by fathead minnows. *Anim Behav*  
526 70(4):777–784
- 527 Firth JA, Sheldon BC (2016) Social carry-over effects underpin trans-seasonally linked  
528 structure in a wild bird population. *Ecol Lett* 19:1324–1332
- 529 Firth JA (2020) Considering complexity: animal social networks and behavioural contagions.  
530 *Trends Ecol Evol* 35:100–104
- 531 Galef Jr BG, Giraldeau L-A (2001) Social influences on foraging in vertebrates: causal  
532 mechanisms and adaptive functions. *Anim Behav* 61:3–15
- 533 Gil MA, Hein AM (2017) Social interactions among grazing reef fish drive material flux in a  
534 coral reef ecosystem. *Proc Natl Acad Sci USA* 114:4703–4708
- 535 Gil MA, Emberts Z, Jones H, St. Mary CM (2017) Social information on fear and food drives  
536 animal grouping and fitness. *Am Nat* 189:227–241
- 537 Gil MA, Hein AM, Spiegel O, Baskett ML, Sih A (2018) Social information links individual  
538 behavior to population and community dynamics. *Trends Ecol Evol* 33:535–548
- 539 Gil MA, Baskett ML, Schreiber SJ (2019) Social information drives ecological outcomes  
540 among competing species. *Ecology* 100:e02835

- 541 Goodale E, Beauchamp G, Magrath RD, Nieh JC, Ruxton GD (2010) Interspecific  
542 information transfer influences animal community structure. *Trends Ecol Evol* 25:354–  
543 361
- 544 Greggor AL, Thornton A, Clayton NS (2017) Harnessing learning biases is essential for  
545 applying social learning in conservation. *Behav Ecol Sociobiol* 71(1):1–12
- 546 Grüter C, Leadbeater E (2014) Insights from insects about adaptive social information use.  
547 *Trends Ecol Evol* 29:177–184
- 548 Haggerty MB, Anderson TW, Long JD (2018) Fish predators reduce kelp frond loss via a  
549 trait-mediated trophic cascade. *Ecology* 99(7):1574–1583
- 550 Hämäläinen L, Hoppitt W, Rowland HM, Mappes J, Fulford AJ, Sosa S, Thorogood R (2021)  
551 Social transmission in the wild can reduce predation pressure on novel prey signals. *Nat*  
552 *Commun* 12:1–11
- 553 Hermann SL, Landis DA (2017) Scaling up our understanding of non-consumptive effects in  
554 insect systems. *Curr Opin Insect Sci* 20:54–60
- 555 Hingee M, Magrath RD (2009) Flights of fear: a mechanical wing whistle sounds the alarm in  
556 a flocking bird. *Proc R Soc B* 276:4173–4179
- 557 Hoppitt W, Laland KN (2013) *Social Learning: An Introduction to Mechanisms, Methods,*  
558 *and Models.* Princeton University Press, Princeton
- 559 Imron MA, Gergs A, Berger U (2012) Structure and sensitivity analysis of individual-based  
560 predator–prey models. *Reliab Eng Syst Saf* 107:71–81
- 561 Iooss B, Lemaître P (2015) A review on global sensitivity analysis methods. In: Dellino G and  
562 Meloni C (eds) *Uncertainty management in simulation-optimization of complex*  
563 *systems.* Springer, Boston, pp 101–122
- 564 Kendal RL, Boogert NJ, Rendell L, Laland KN, Webster M, Jones PL (2018) Social learning  
565 strategies: Bridge-building between fields. *Trends Cogn Sci* 22:651–665



- 566 King AJ, Cowlshaw G (2007) When to use social information: the advantage of large group  
567 size in individual decision making. *Biol Lett* 3(2):137–139
- 568 Laland KN (1992) A theoretical investigation of the role of social transmission in evolution.  
569 *Ethol Sociobiol* 13:87–113
- 570 Latora V, Marchiori M (2001) Efficient behavior of small-world networks. *Phys Rev*  
571 *Lett* 87(19):198701
- 572 Lima SL (1990) The influence of models on the interpretation of vigilance. In: Bekoff M and  
573 Jamieson D (eds) *Interpretation and explanation in the study of animal behavior:*  
574 *Explanation, evolution and adaptation*. Vol 2. Westview Press, Boulder, pp 246–267
- 575 Lima SL, Dill LM (1990) Behavioral decisions made under the risk of predation: a review and  
576 prospectus. *Can J Zool* 68(4):619–640
- 577 Manassa RP, McCormick MI, Chivers DP, Ferrari MCO (2013) Social learning of predators  
578 in the dark: understanding the role of visual, chemical and mechanical information. *Proc*  
579 *R Soc B* 280(1765):20130720
- 580 Manzur T, Gonzalez-Mendez A, Broitman BR (2018) Scales of predator detection behavior  
581 and escape in *Fissurella limbata*: A field and laboratory assessment. *Mar Ecol*  
582 39(2):e12492
- 583 Martín J, Luque-Larena JJ, López P (2006) Collective detection in escape responses of  
584 temporary groups of Iberian green frogs. *Behav Ecol* 17:222–226
- 585 Morris MD (1991) Factorial sampling plans for preliminary computational experiments.  
586 *Technometrics* 33:161–174
- 587 O'Mara MT, Dechmann DK, Page RA (2014) Frugivorous bats evaluate the quality of social  
588 information when choosing novel foods. *Behav Ecol* 25(5):1233–1239
- 589 Parejo D, Avilés JM (2016) Social information use by competitors: resolving the enigma of  
590 species coexistence in animals? *Ecosphere* 7:e01295

- 591 Pasquaretta C, Levé M, Claidiere N, Van de Waal E, Whiten A, MacIntosh AJ, et al (2014).  
592 Social networks in primates: smart and tolerant species have more efficient networks.  
593 Sci Rep 4:1–8
- 594 Pays O, Beauchamp G, Carter AJ, Goldizen AW (2013) Foraging in groups allows collective  
595 predator detection in a mammal species without alarm calls. Behav Ecol 24:1229–1236
- 596 Peckarsky BL, Abrams PA, Bolnick DI, Dill LM, Grabowski JH, Luttbeg B, et al (2008)  
597 Revisiting the classics: considering nonconsumptive effects in textbook examples of  
598 predator–prey interactions. Ecology 89:2416–2425
- 599 Pereira AG, Moita MA (2016) Is there anybody out there? Neural circuits of threat detection  
600 in vertebrates. Curr Opin Neurobiol 41:179–187
- 601 Pessarrodona A, Boada J, Pagès JF, Arthur R, Alcoverro T (2019) Consumptive and  
602 nonconsumptive effects of predators vary with the ontogeny of their prey. Ecology  
603 100(5):e02649
- 604 Polis GA, Sears AL, Huxel GR, Strong DR, Maron J (2000) When is a trophic cascade a  
605 trophic cascade? Trends Ecol Evol 15(11):473–475
- 606 Preisser EL, Orrock JL, Schmitz OJ (2007) Predator hunting mode and habitat domain alter  
607 nonconsumptive effects in predator–prey interactions. Ecology 88(11):2744–2751
- 608 R Core Team (2021) R: A language and environment for statistical computing. R foundation  
609 for statistical computing, Vienna, Austria.
- 610 Romano V, Shen M, Pansanel J, MacIntosh AJ, Sueur C (2018) Social transmission in  
611 networks: global efficiency peaks with intermediate levels of modularity. Behav Ecol  
612 Sociobiol 72:1–10
- 613 Rosenthal SB, Twomey CR, Hartnett AT, Wu HS, Couzin ID (2015) Revealing the hidden  
614 networks of interaction in mobile animal groups allows prediction of complex  
615 behavioral contagion. Proc Natl Acad Sci USA 112:4690–4695

- 616 Sih A, Hanser SF, McHugh KA (2009) Social network theory: new insights and issues for  
617 behavioral ecologists. *Behav Ecol Sociobiol* 63:975–988
- 618 Spiegel O, Leu ST, Sih A, Bull CM (2016) Socially interacting or indifferent neighbours?  
619 Randomization of movement paths to tease apart social preference and spatial  
620 constraints. *Methods Ecol Evol* 7:971–979
- 621 Strandburg-Peshkin A, Twomey CR, Bode NW, Kao AB, Katz Y, Ioannou CC, et al (2013)  
622 Visual sensory networks and effective information transfer in animal groups. *Curr Biol*  
623 23:R709–R711
- 624 Ten Broeke G, Van Voorn G, Ligtenberg A (2016) Which sensitivity analysis method should  
625 I use for my agent-based model?. *J Artif Soc Soc Simul* 19:5
- 626 Tholt G, Kis A, Medzihradzky A, Szita É, Tóth Z, Havelda Z, Samu F (2018) Could vectors’  
627 fear of predators reduce the spread of plant diseases? *Sci Rep* 8(1):1–10
- 628 Thorogood R, Kokko H, Mappes J (2018) Social transmission of avoidance among predators  
629 facilitates the spread of novel prey. *Nat Ecol Evol* 2(2):254–261
- 630 Tisdale V, Fernández-Juricic E (2009) Vigilance and predator detection vary between avian  
631 species with different visual acuity and coverage. *Behav Ecol* 20(5):936–945
- 632 Tóth Z (2021) The hidden effect of inadvertent social information use on fluctuating  
633 predator–prey dynamics. *Evol Ecol* 35:101–114
- 634 Tóth Z, Jaloveczki B, Tarján G (2020) Diffusion of social information in non-grouping  
635 animals. *Front Ecol Evol* 8:586058
- 636 Waters JS, Fewell JH (2012) Information processing in social insect networks. *PLoS ONE*  
637 7:e40337
- 638 Watson CG (2020) brainGraph: Graph Theory Analysis of Brain MRI Data. R package  
639 version 3.0.0. <https://CRAN.R-project.org/package=brainGraph>

- 640 Webber QM, Vander Wal E (2018) An evolutionary framework outlining the integration of  
641 individual social and spatial ecology. *J Anim Ecol* 87:113–127
- 642 Weissburg M, Smee DL, Ferner MC (2014) The sensory ecology of nonconsumptive predator  
643 effects. *Am Nat* 184(2):141–157
- 644 White JW, Rassweiler A, Samhouri JF, Stier AC, White C (2014) Ecologists should not use  
645 statistical significance tests to interpret simulation model results. *Oikos* 123:385–388

646 Table 1. Model parameters and their range for sensitivity analysis (SA). Maximum movement  
 647 distances indicate the maximum number of spatial units that an individual could travel on the  
 648 landscape in a simulation cycle; the actual integer value was randomly selected between zero  
 649 and this maximum value.

| Symbol                     | Description                                                                                                                                         | Nominal value      | Unit/Scale         | Range for SA |
|----------------------------|-----------------------------------------------------------------------------------------------------------------------------------------------------|--------------------|--------------------|--------------|
| $d_{\text{prey}}$          | Prey maximum movement distance                                                                                                                      | 5                  | 1                  | 3-8          |
| $d_{\text{p}}$             | Predator maximum movement distance                                                                                                                  | 5                  | 1                  | 3-8          |
| $r_{\text{prey}}$          | Prey detection range                                                                                                                                | 2.5<br>(constant)  | -                  | -            |
| $r_{\text{p}}$             | Predator hunting range                                                                                                                              | 3.5<br>(constant)  | -                  | -            |
| $r_{\text{c}}$             | Competition range within which only one individual could survive                                                                                    | 1<br>(constant)    | -                  | -            |
| $P_{\text{detect}}$        | Probability of prey detecting a nearby predator; determined by individual Bernoulli trials                                                          | 0.5                | 0.1                | 0.1-0.9      |
| $P_{\text{isi}}$           | Probability of prey ISI use (i.e., copying the defensive behaviour of others); determined by individual Bernoulli trials                            | 0.5                | 0.1                | 0-0.9        |
| $\lambda_{\text{max}}$     | Prey reproduction-related shape parameter when prey feed; used to draw a random number of offspring for each individual from a Poisson distribution | 0.75<br>(constant) | -                  | -            |
| $\lambda_{\text{reduced}}$ | Prey reproduction-related shape parameter                                                                                                           | 0.75               | $5 \times 10^{-2}$ | 0.5-0.75     |

|             |                                                                                                                                                   |                    |                    |                                                |
|-------------|---------------------------------------------------------------------------------------------------------------------------------------------------|--------------------|--------------------|------------------------------------------------|
|             | when prey is alarmed (i.e., does not feed);<br>used to draw a random number of offspring<br>for each individual from a Poisson<br>distribution    |                    |                    |                                                |
| $\lambda_P$ | Predator reproduction-related shape<br>parameter; used to draw a random number of<br>offspring for each individual from a Poisson<br>distribution | $5 \times 10^{-2}$ | $5 \times 10^{-3}$ | $2.5 \times 10^{-2}$ -<br>$7.5 \times 10^{-2}$ |

650

651 Table 2. Descriptive statistics of the simulated prey populations computed from the 200<sup>th</sup>  
 652 simulation cycle calculated from 50 replicates (49 in the case of the second model type as  
 653 prey population died out in a single iteration).

| Models                                          | Parameters          |                  | Prey population size |           |
|-------------------------------------------------|---------------------|------------------|----------------------|-----------|
|                                                 | $P_{\text{detect}}$ | $P_{\text{isi}}$ | Mean $\pm$ SD        | Range     |
| No predators ( $n=50$ )                         | -                   | -                | 1198.16 $\pm$ 24.37  | 1115-1251 |
| Minimal predator detection ( $n=49$ )           | 0.1                 | 0                | 154.45 $\pm$ 56.49   | 24-257    |
| Nominal predator detection ( $n=50$ )           | 0.5                 | 0                | 516.18 $\pm$ 50.36   | 408-637   |
| Nominal predator detection & ISI use ( $n=50$ ) | 0.5                 | 0.5              | 789.52 $\pm$ 48.05   | 632-891   |

654 Figure legends

655

656 Figure 1. Model flowchart for a single simulation cycle. Sequential prey and predator  
657 behaviours are listed together with the model parameter(s) associated with the given steps.  
658 Behavioural steps resulting in a decrease in population size, i.e., mortality due to intraspecific  
659 competition (in rounded rectangles) or predation (in diamond) are shown in light and dark  
660 grey, respectively.

661

662 Figure 2. Schematic figure of a detection network (a) and segment of an individual ego  
663 network embedded within that network (b). Nodes represent individuals and edges denote the  
664 possibility of mutual observation. The probability of information acquisition from one node to  
665 another is given by  $w^k$ , where  $w$  is the edge weight and  $k$  is the number of steps on the shortest  
666 path between the two nodes. For any individual, the total probability of receiving information  
667 from neighbours is calculated using the inclusion-exclusion principle. In our model, we used  
668 the settings  $k_{\max}=2$  and  $\sum n_{\max}=5$  in each  $k$  step, so the focal individual (black circle) could  
669 receive social information from a maximum of ten neighbours that were a maximum of two  
670 steps away in the detection network (orange circles).

671

672 Figure 3. Effects of the  $P_{\text{detect}}$  and  $P_{\text{isi}}$  model parameters on the prey population. (a) Temporal  
673 fluctuations in prey abundance (means with range) without predators (grey) and under  
674 nominal parameter settings (with nominal  $P_{\text{detect}}$  &  $P_{\text{isi}}$  – orange, with nominal  $P_{\text{detect}}$  – dark  
675 blue, with minimal  $P_{\text{detect}}$  – light blue). When the predator detection probability was set to its  
676 minimal value, the prey population died out in a single iteration; in all other cases, the number  
677 of iterations was set to 50. (b) Results of the global sensitivity analysis (SA) depicting the  
678 impact of each model parameter on the mean ( $x$ -axis) and standard deviation ( $y$ -axis) of prey



679 abundance; mean  $\pm$  SD values for each parameter were calculated from five independent SA  
680 runs. Inset shows the model parameters ordered according to their overall influence on the  
681 model output.

682

683 Figure 4. The relationship between per capita mortality due to predation and the number of  
684 predators using the same parameter settings as in Fig. 3a (but without the ‘No predators’  
685 group). Trend lines were fitted using second-order polynomial approximation. Simulation  
686 results from incomplete runs (i.e., simulation cycles were less than 200) were omitted from  
687 the dataset ( $n=204$ ; only in the ‘minimal predator detection’ model type).

688

689 Figure 5. Interactive effects of the probability of ISI use ( $P_{\text{isi}}$ ), predation pressure ( $\lambda_{\text{p}}$ ) and the  
690 presence of fitness cost (associated with the defensive behaviour;  $\lambda_{\text{reduced}}$ ) on prey population  
691 size in three  $P_{\text{detect}}$  scenarios. The colour of the boxplots indicates the level of predation  
692 pressure (purple: high, blue: intermediate, green: low), while the colour tone is associated  
693 with the presence of cost (dark: costly defensive behaviour, light: no cost). Trend lines were  
694 fitted using the ‘LOESS’ regression method for smoothing with the default value of span  
695 (0.75); presented only for illustration purposes. Simulation results from incomplete runs were  
696 omitted from the dataset ( $n=581$ ; only in the ‘ $P_{\text{detect}}=0.25$ ’ setting).

697

698 Figure 6. Four structural network properties (a: number of components, b: component size, c:  
699 average size of ego networks, d: global network efficiency in the largest components)  
700 calculated for the observed detection networks (circles) and corresponding randomized  
701 networks (diamonds). Predation pressure was set to ‘high’ (i.e.,  $\lambda_{\text{p}}=0.075$ ). The colour of the  
702 boxplots indicates the absence (gray;  $P_{\text{isi}}=0$ ) or presence of ISI use (orange;  $P_{\text{isi}}=0.5$ ).

**Cycle starts**

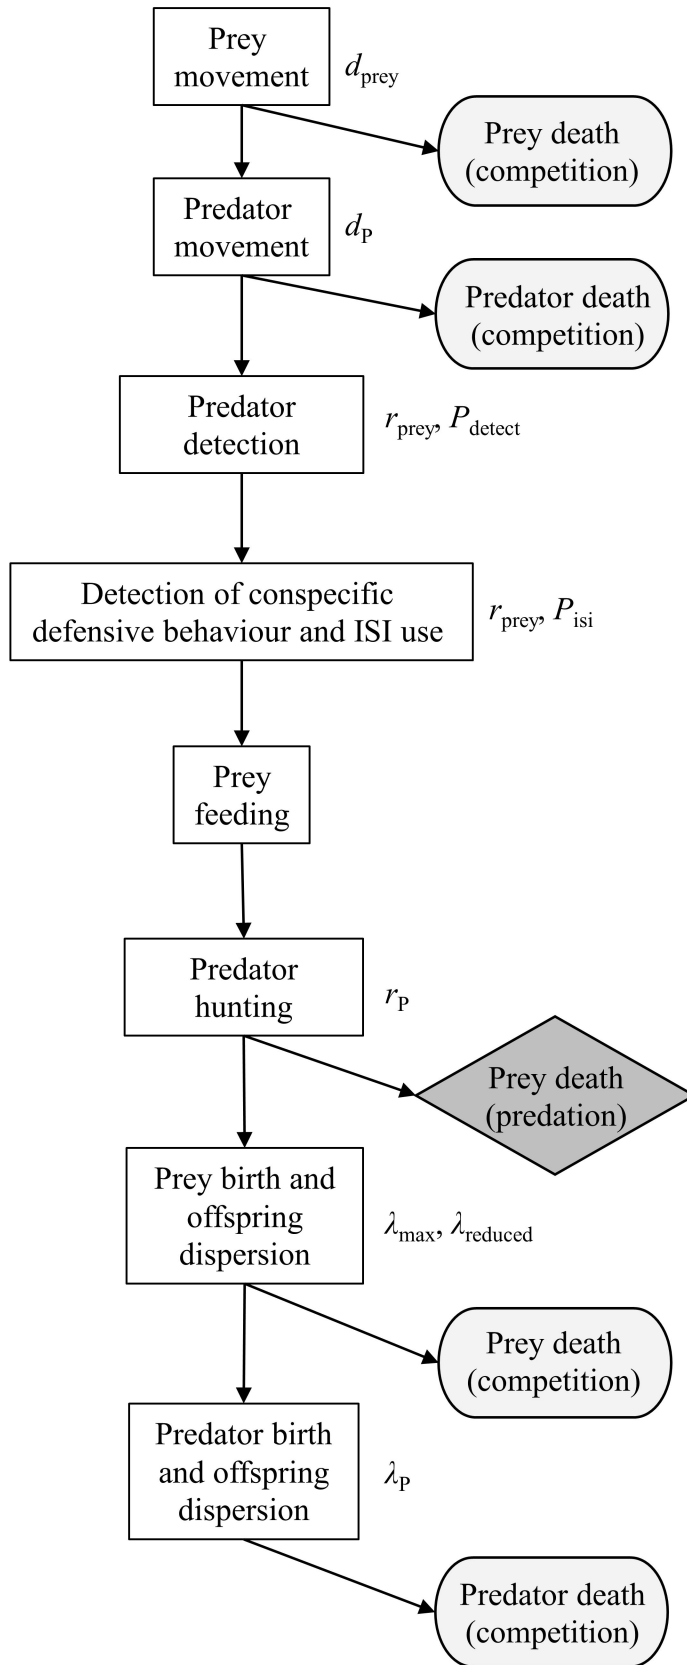

**Cycle ends**

**(a)**

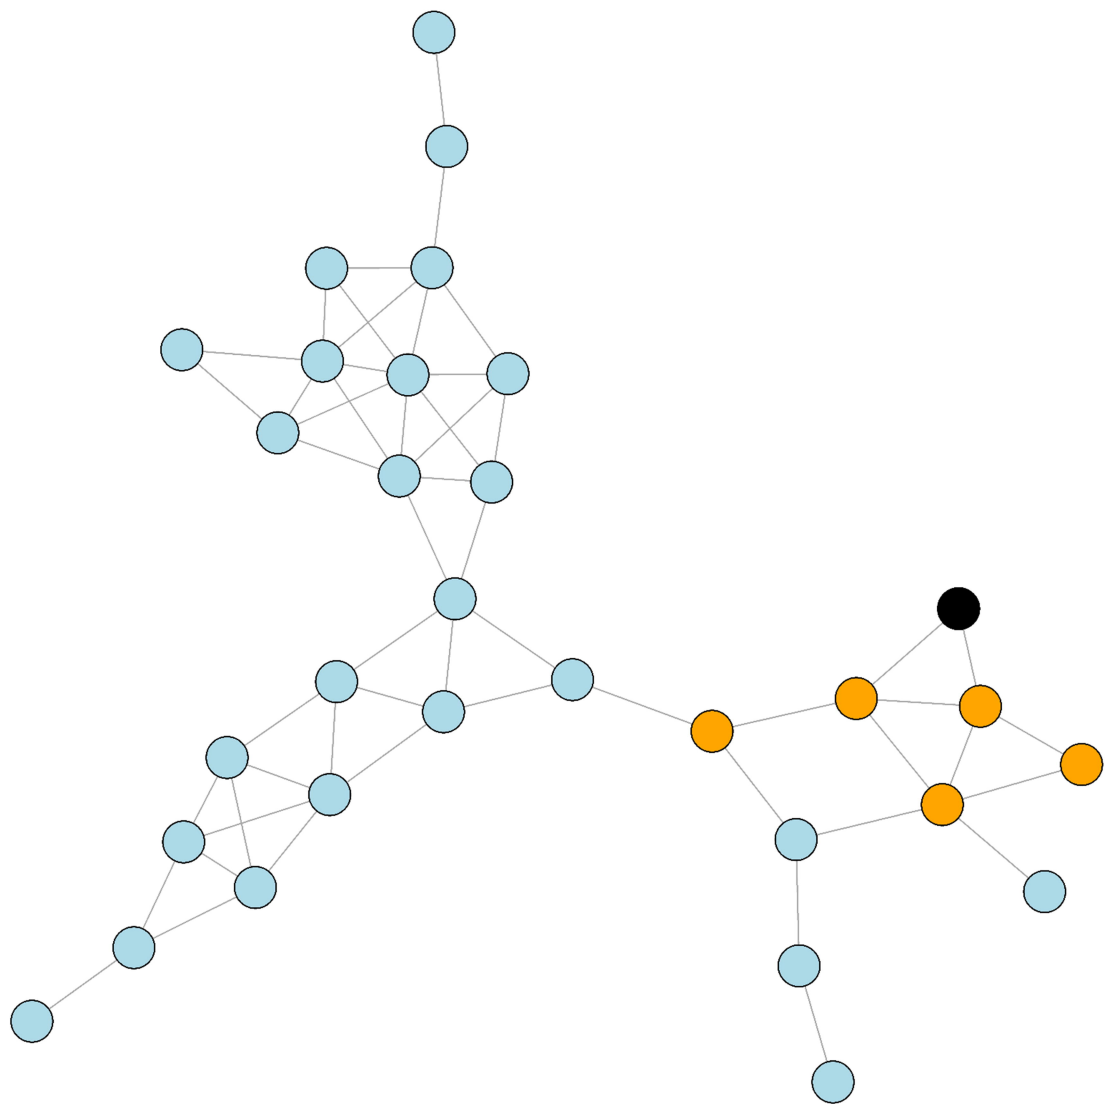

**(b)**

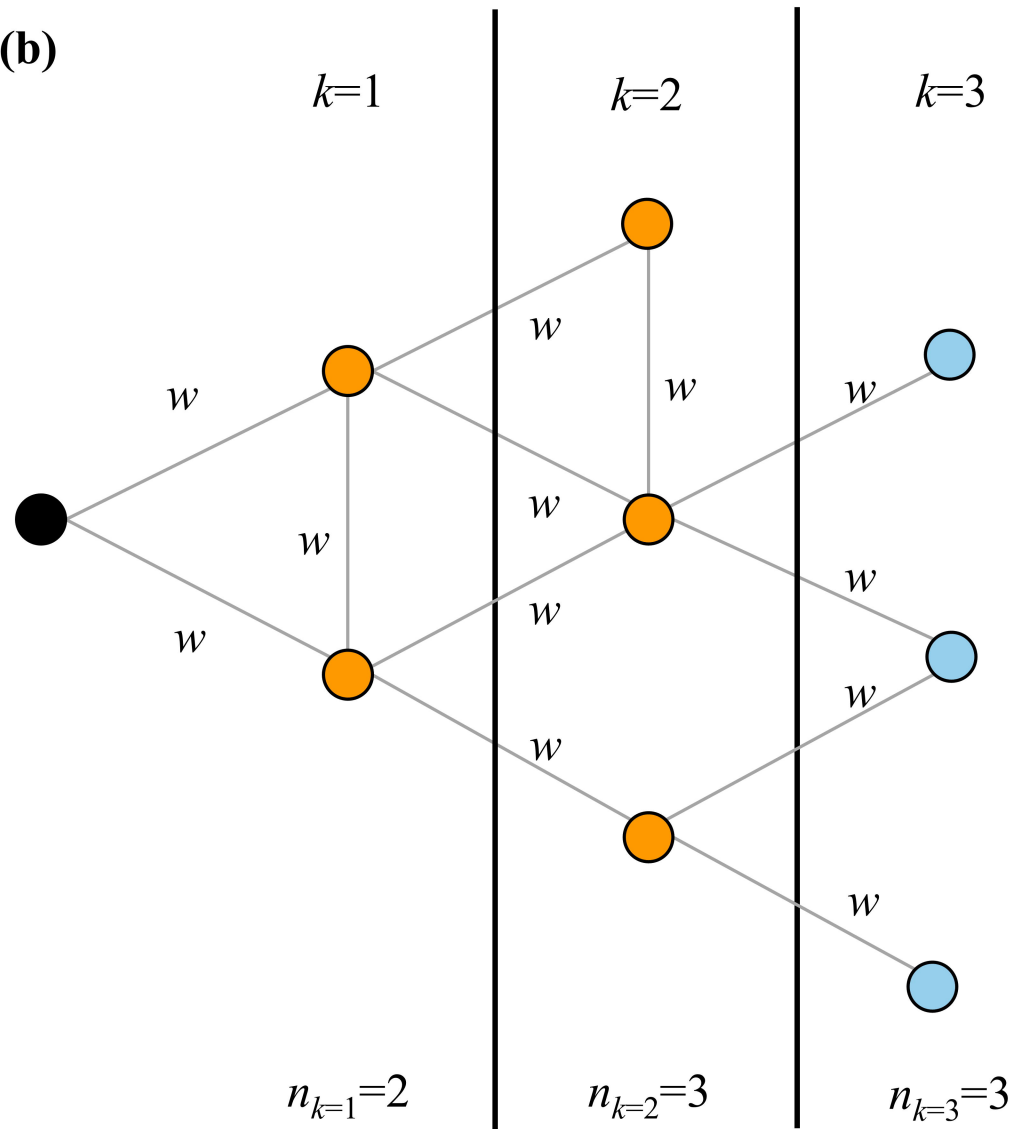

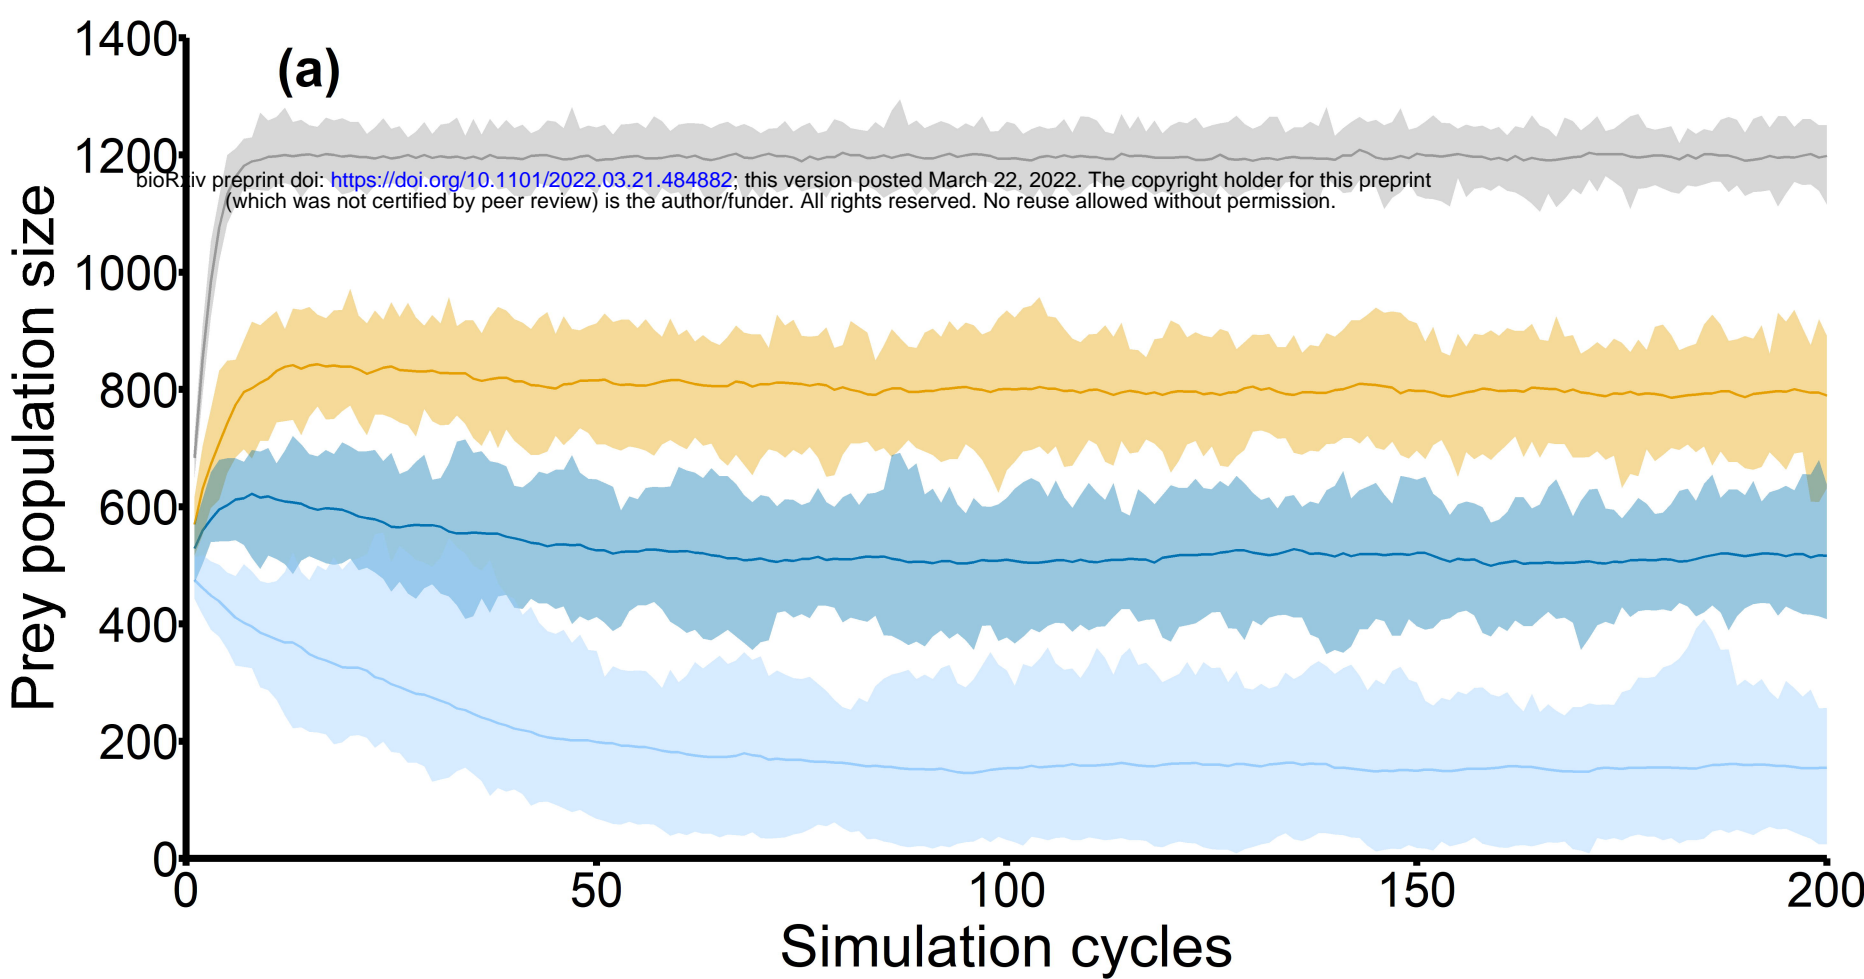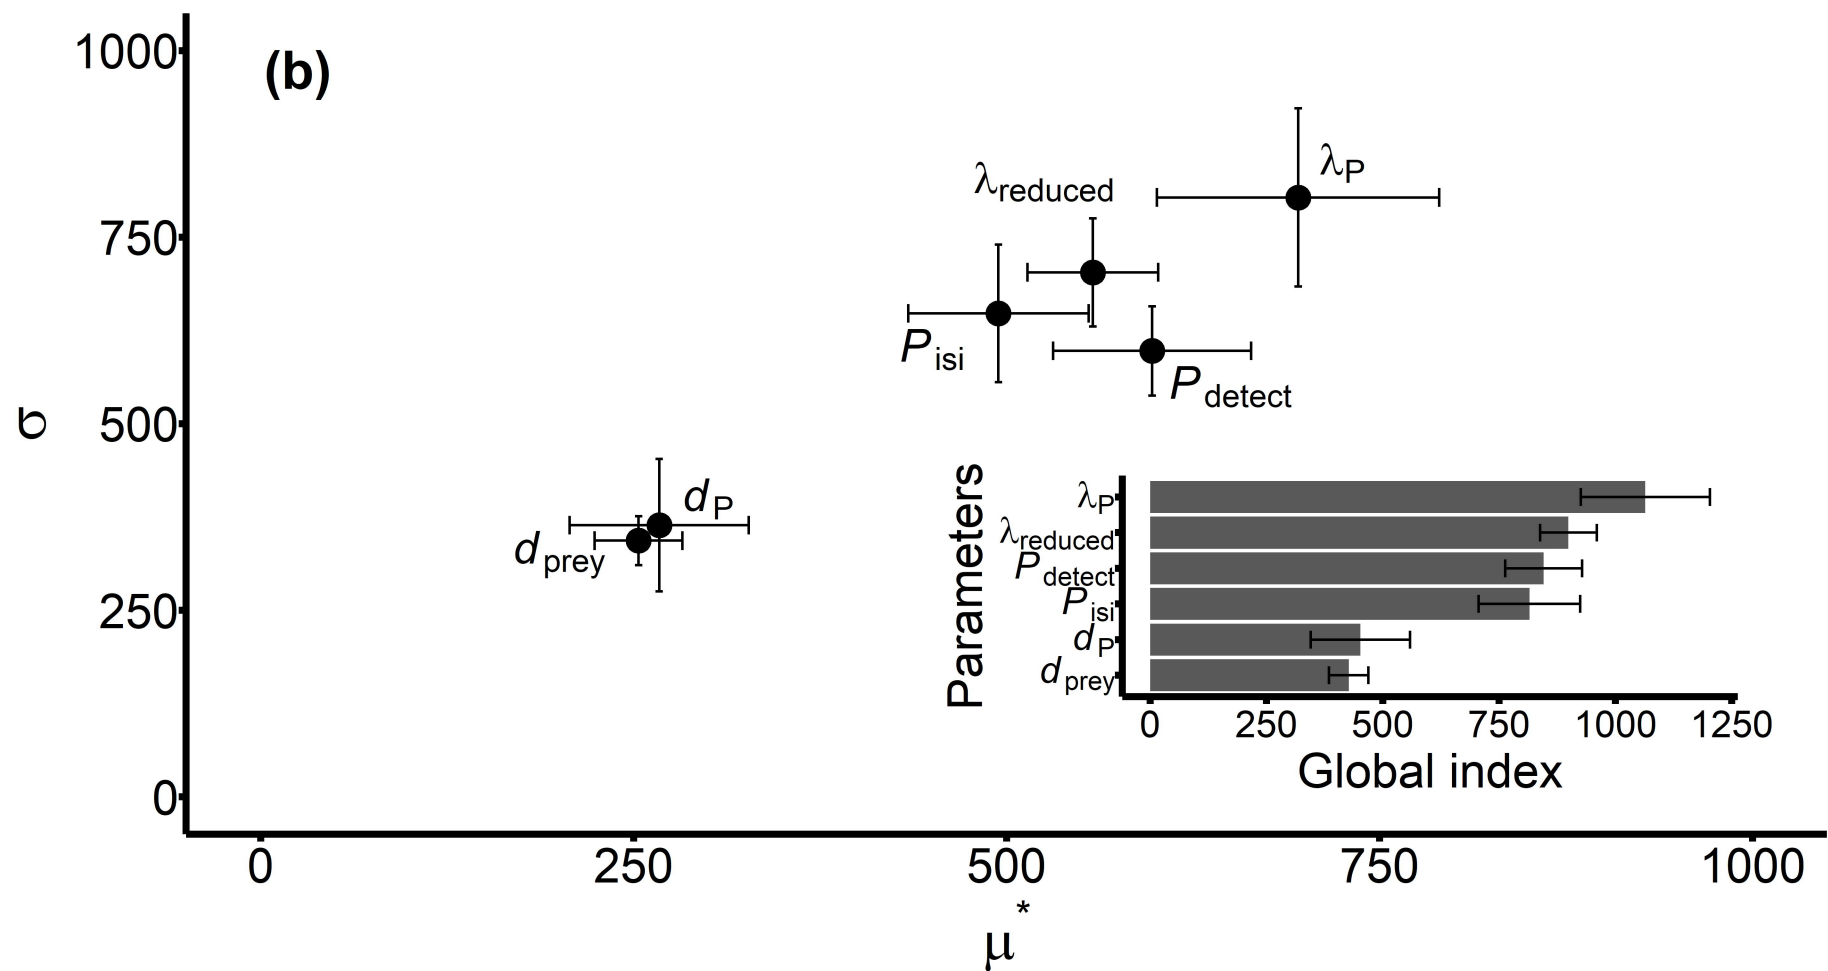

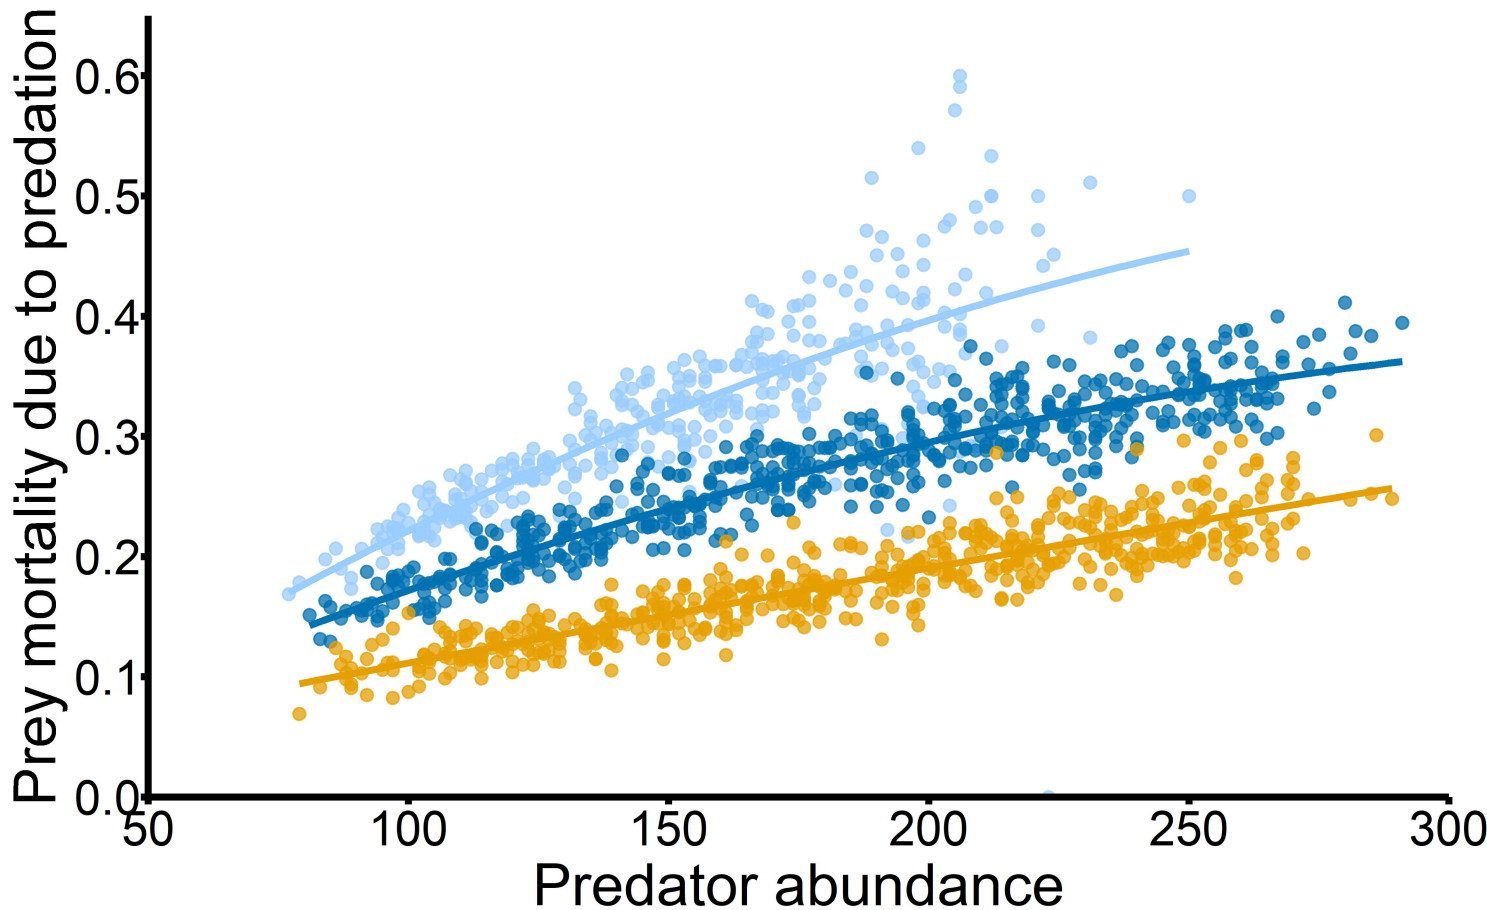

—  $P_{\text{detect}} \& P_{\text{isi}} = 0.5$  —  $P_{\text{detect}} = 0.5$  —  $P_{\text{detect}} = 0.1$

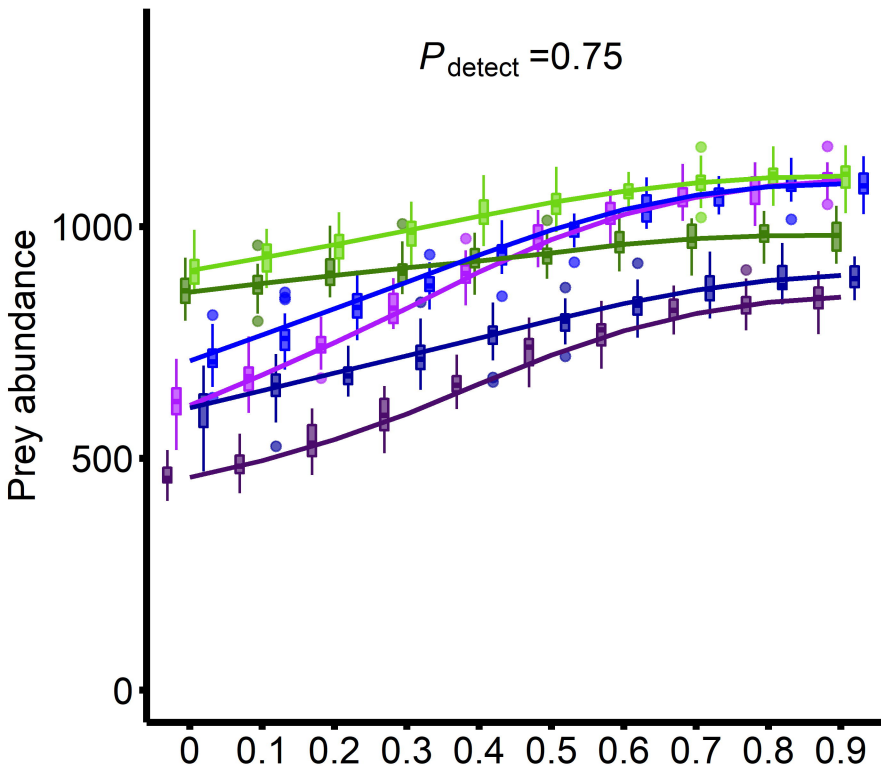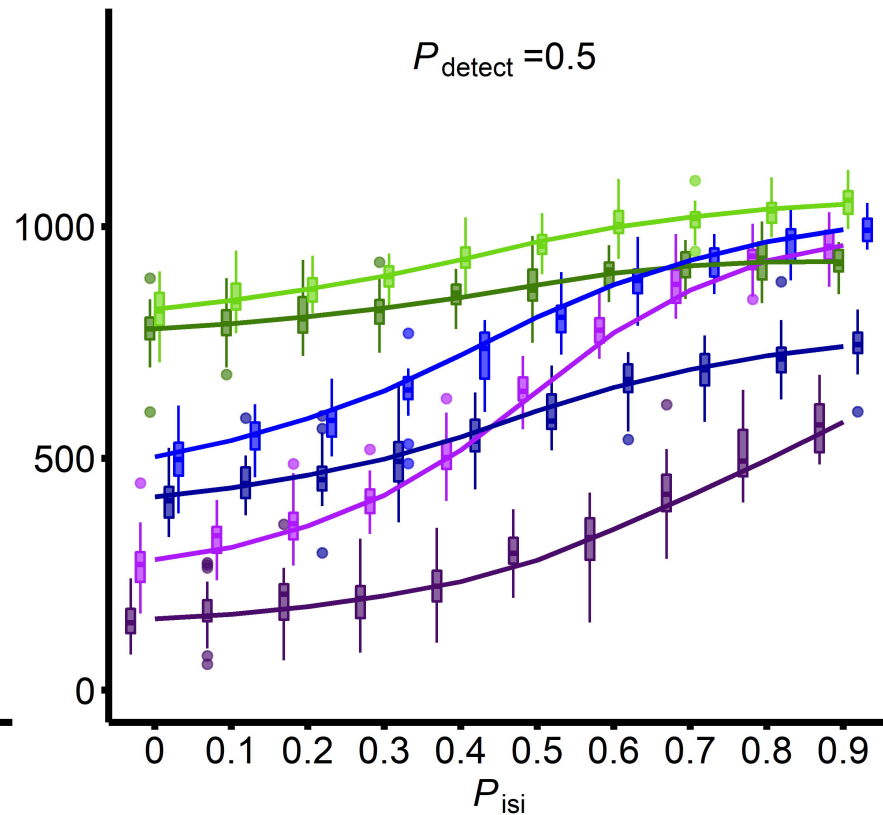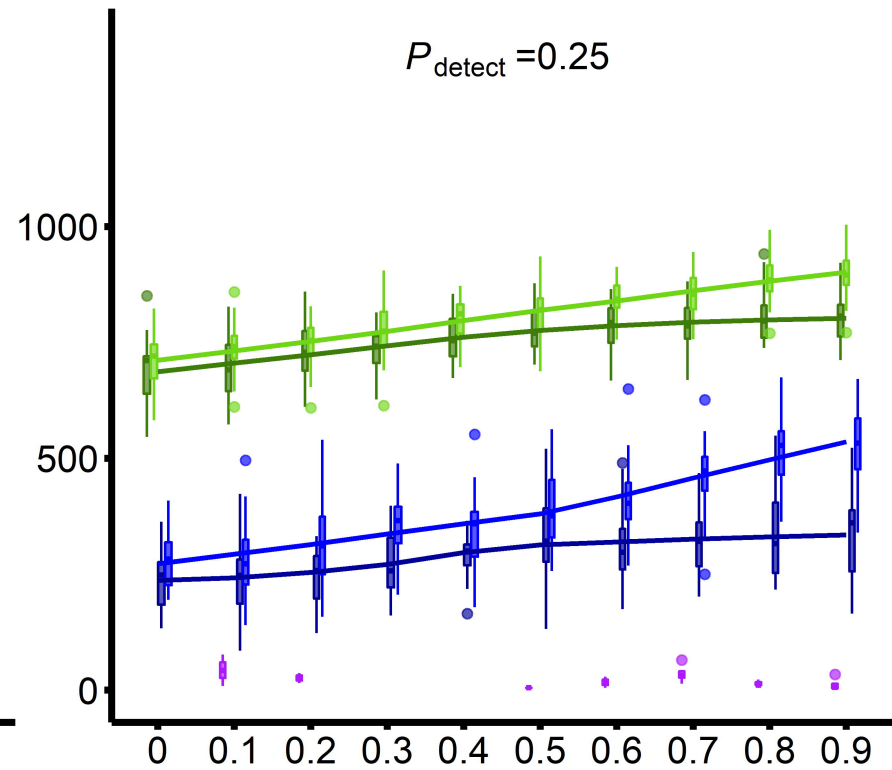

Low predation pressure & costly defensive behaviour ( $\lambda_P=0.025$ ;  $\lambda_{\text{reduced}}=0.5$ )

Intermediate predation pressure & costly defensive behaviour ( $\lambda_P=0.05$ ;  $\lambda_{\text{reduced}}=0.5$ )

High predation pressure & costly defensive behaviour ( $\lambda_P=0.075$ ;  $\lambda_{\text{reduced}}=0.5$ )

Low predation pressure & no cost ( $\lambda_P=0.025$ ;  $\lambda_{\text{reduced}}=\lambda_{\text{max}}=0.75$ )

Intermediate predation pressure & no cost ( $\lambda_P=0.05$ ;  $\lambda_{\text{reduced}}=\lambda_{\text{max}}=0.75$ )

High predation pressure & no cost ( $\lambda_P=0.075$ ;  $\lambda_{\text{reduced}}=\lambda_{\text{max}}=0.75$ )

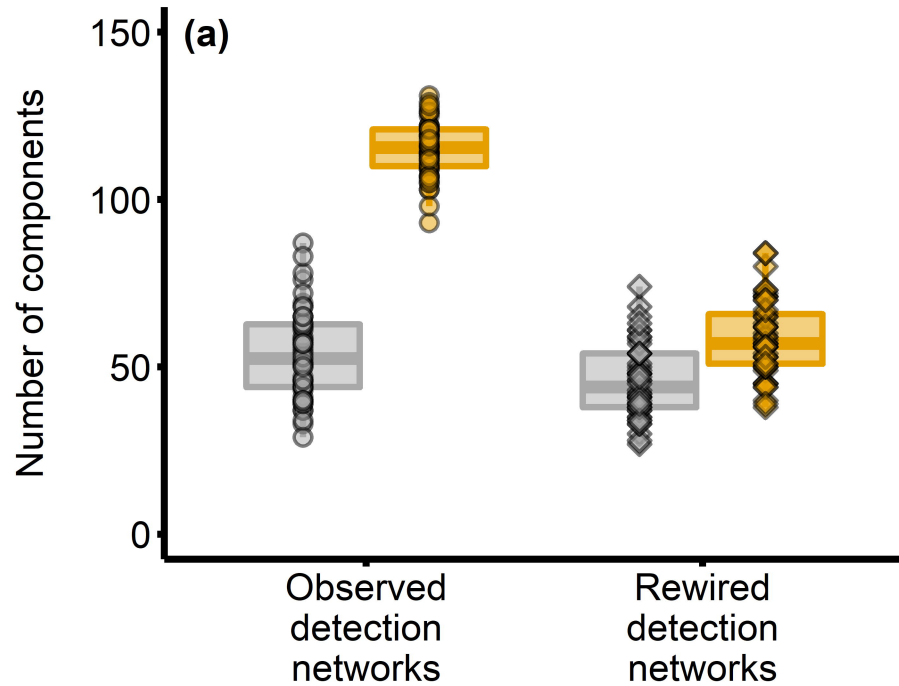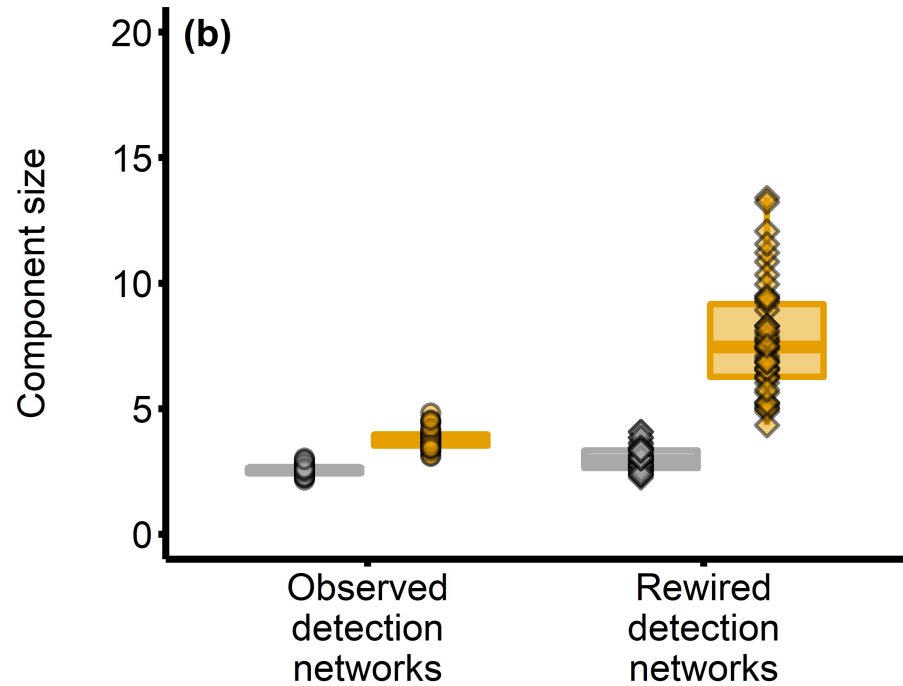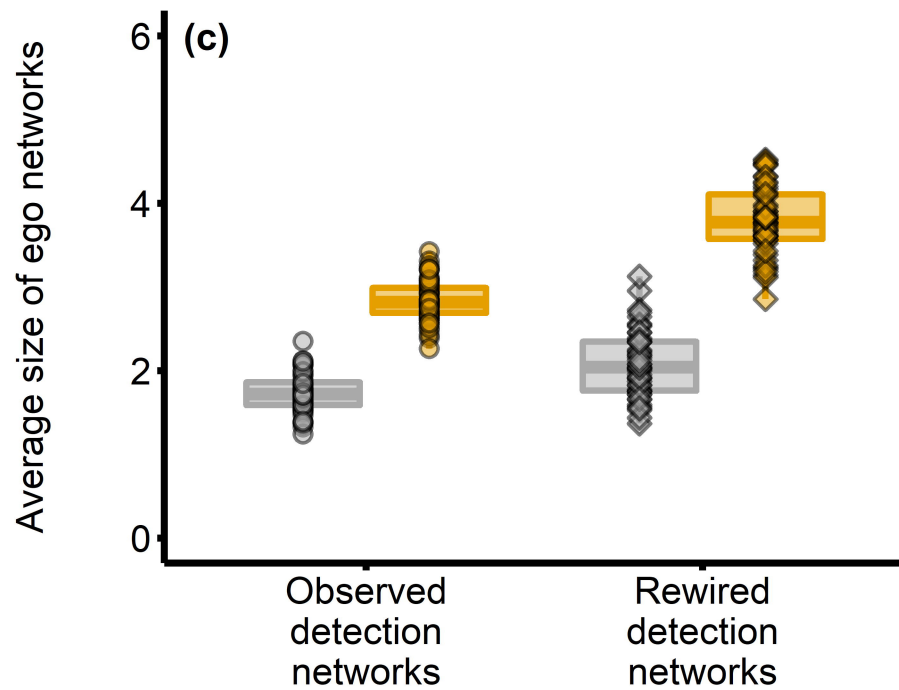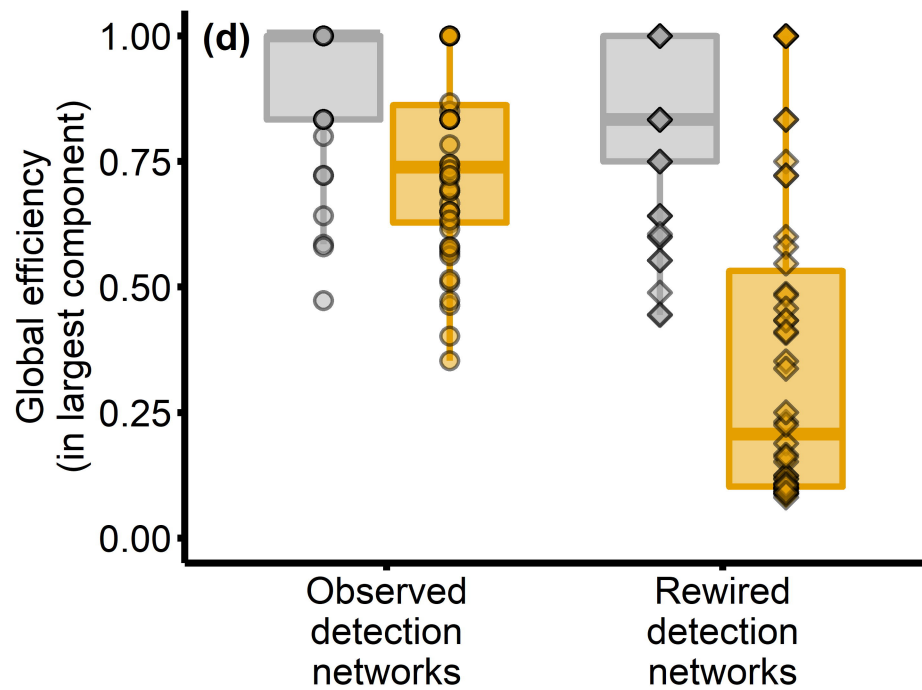

  $P_{\text{isi}}=0$    $P_{\text{isi}}=0.5$
